# Supplementary material for: Evaluation of Racial, Ethnic, and Socioeconomic Disparities in Initiation of Kidney Failure Treatment During the First 4 Months of the COVID-19 Pandemic
Source: PubMed Central journal article supplement (PMC8498850; doi:10.1001/jamanetworkopen.2021.27369), 2021-10-07
Supplement: jamanetwopen-e2127369-s001.pdf [file jamanetwopen-e2127369-s001.pdf]

## Supplemental Online Content

Nguyen KH, Thorsness R, Hayes S, et al. Evaluation of racial, ethnic, and socioeconomic disparities in initiation of kidney failure treatment during the first 4 months of the COVID-19 pandemic. *JAMA Netw Open.* 2021;4(10):e2127369.  
doi:10.1001/jamanetworkopen.2021.27369

**eTable 1.** Measure Definitions Data Sources

**eTable 2.** Characteristics of Patients with Incident Kidney Failure by Quintile of Neighborhood Area Disadvantage, 2018-2020

**eTable 3.** Characteristics of Patients with Incident Kidney Failure by Residence in a County COVID-19 Mortality Rate Quintile, 2018-2020

**eFigure 1.** Monthly Trends in Number of Incident Kidney Failure Patients by Race/Ethnicity, Neighborhood Socioeconomic Disadvantage, and County-Level COVID-19 Mortality Rate, January 2018-June 2020

**eFigure 2.** Trends in Mean Estimated Glomerular Filtration Rate (eGFR) at Treatment Initiation by Race/Ethnicity, Neighborhood Disadvantage, and COVID-19 Mortality Rate, January 2018-June 2020

**eFigure 3.** Comparison of Observed and Estimated Number of Patients with Incident Kidney Failure by Week, January 2018-June 2020

**eFigure 4.** Changes in Kidney Failure Incidence by Week and Race/Ethnicity, January 2018-June 2020

### eReferences

This supplemental material has been provided by the authors to give readers additional information about their work.

**eTable 1. Measure Definitions Data Sources**

| Variable                                                                      | Data Source(s)                                                                                                                                                                 |
|-------------------------------------------------------------------------------|--------------------------------------------------------------------------------------------------------------------------------------------------------------------------------|
| Incident kidney failure cases                                                 | End-Stage Renal Disease Medical Evidence Report (CMS 2728) <sup>1</sup>                                                                                                        |
| Stratified Analyses                                                           |                                                                                                                                                                                |
| Race/Ethnicity                                                                | End-Stage Renal Disease Medical Evidence Report (CMS 2728) <sup>1</sup>                                                                                                        |
| Residing in a socioeconomically disadvantaged neighborhood (highest quintile) | Area Deprivation Index, V3.0 <sup>2,3</sup> using the Census Block Group-level measure                                                                                         |
| Residing in a county with high COVID-19 mortality rate (highest quintile)     | Numerator: Number of COVID-19-related deaths, March 1, 2020-June 30,2020 <sup>4</sup><br>Denominator: U.S. Census Bureau County Annual Population Estimates, 2020 <sup>5</sup> |

**eTable 2.** Characteristics of Patients with Incident Kidney Failure by Quintile of Neighborhood Area Disadvantage, 2018-2020 <sup>a,b</sup>

| Characteristic                                            | Lowest Quintile of Neighborhood Socioeconomic Disadvantage |                |        | Highest Quintile of Neighborhood Socioeconomic Disadvantage |                |        |
|-----------------------------------------------------------|------------------------------------------------------------|----------------|--------|-------------------------------------------------------------|----------------|--------|
|                                                           | 2018-2019                                                  | 2020           | p      | 2018-2019                                                   | 2020           | p      |
| N                                                         | 14,201                                                     | 5,840          |        | 20,135                                                      | 9,169          |        |
| Age, mean (SD)                                            | 64.9<br>(15.7)                                             | 64.7<br>(15.3) | 0.44   | 61.2<br>(14.8)                                              | 60.9<br>(14.9) | 0.040  |
| Age Category, %                                           |                                                            |                |        |                                                             |                |        |
| 0-17                                                      | 0.7                                                        | 0.7            | 0.13   | 0.5                                                         | 0.6            | 0.21   |
| 18-44                                                     | 10.0                                                       | 9.7            |        | 13.2                                                        | 13.7           |        |
| 45-64                                                     | 33.3                                                       | 33.8           |        | 41.1                                                        | 41.2           |        |
| 65-74                                                     | 26.1                                                       | 27.5           |        | 26.3                                                        | 26.3           |        |
| 75 and older                                              | 29.9                                                       | 28.3           |        | 18.9                                                        | 18.1           |        |
| Male                                                      | 62.2                                                       | 61.7           | 0.59   | 53.9                                                        | 54.5           | 0.37   |
| Female, %                                                 | 37.8                                                       | 38.3           | 0.59   | 46.1                                                        | 45.5           | 0.37   |
| Race/Ethnicity, %                                         |                                                            |                |        |                                                             |                |        |
| White                                                     | 47.9                                                       | 44.6           | <0.001 | 44.0                                                        | 37.9           | <0.001 |
| Black                                                     | 15.4                                                       | 16.1           | 0.19   | 39.3                                                        | 43.5           | <0.001 |
| Hispanic/Latino                                           | 18.7                                                       | 19.0           | 0.66   | 13.3                                                        | 15.1           | <0.001 |
| Current Employment Status, %                              |                                                            |                |        |                                                             |                |        |
| Retired (Age or Disability)                               | 56.6                                                       | 57.9           | 0.39   | 57.4                                                        | 58.0           | 0.007  |
| Unemployed                                                | 21.3                                                       | 20.9           |        | 28.9                                                        | 27.5           |        |
| Employed (Full/Part)                                      | 16.4                                                       | 15.8           |        | 9.4                                                         | 9.5            |        |
| Insurance Type, %                                         |                                                            |                |        |                                                             |                |        |
| Dual                                                      | 12.1                                                       | 10.9           | <0.001 | 16.4                                                        | 16.2           | 0.054  |
| Medicare                                                  | 45.5                                                       | 45.9           |        | 44.6                                                        | 43.1           |        |
| Medicaid                                                  | 16.6                                                       | 16.8           |        | 16.7                                                        | 17.4           |        |
| Employer                                                  | 14.7                                                       | 16.3           |        | 9.6                                                         | 9.7            |        |
| Other                                                     | 8.4                                                        | 8.6            |        | 5.0                                                         | 5.6            |        |
| Uninsured                                                 | 2.7                                                        | 1.5            |        | 6.9                                                         | 7.4            |        |
| Primary Cause, %                                          |                                                            |                |        |                                                             |                |        |
| Diabetes                                                  | 45.5                                                       | 45.9           | 0.53   | 50.7                                                        | 48.6           | 0.001  |
| Hypertension                                              | 25.5                                                       | 24.1           | 0.047  | 28.6                                                        | 29.0           | 0.52   |
| Other                                                     | 29.1                                                       | 29.9           | 0.23   | 20.7                                                        | 22.4           | <0.001 |
| Treatment Modality & Setting, %                           |                                                            |                |        |                                                             |                |        |
| In-Center Hemodialysis                                    | 82.3                                                       | 80.3           | <0.001 | 88.4                                                        | 87.8           | 0.16   |
| Home Dialysis                                             | 13.7                                                       | 16.8           | <0.001 | 10.0                                                        | 11.1           | 0.006  |
| Preemptive Kidney Transplant                              | 3.4                                                        | 2.4            | <0.001 | 0.9                                                         | 0.6            | 0.009  |
| Skilled Nursing Facility/Long-Term Care Facility Dialysis | 0.6                                                        | 0.4            | 0.1    | 0.7                                                         | 0.5            | 0.05   |
| Received Pre-Dialysis Nephrology Care, %                  |                                                            |                |        |                                                             |                |        |
| Yes                                                       | 68.7                                                       | 69.7           | 0.13   | 66.8                                                        | 65.1           | <0.001 |
| No                                                        | 15.9                                                       | 14.8           |        | 18.7                                                        | 18.6           |        |
| Unknown                                                   | 15.4                                                       | 15.5           |        | 14.5                                                        | 16.3           |        |
| Vascular Access Type (Hemodialysis Patients), %           |                                                            |                |        |                                                             |                |        |
| Catheter                                                  | 77.7                                                       | 80.8           | <0.001 | 82.9                                                        | 85.9           | <0.001 |
| Arteriovenous Fistula                                     | 18.9                                                       | 16.1           |        | 13.7                                                        | 11.4           |        |
| Other                                                     | 3.4                                                        | 3.1            |        | 3.4                                                         | 2.7            |        |

|                                              |           |           |       |           |           |       |
|----------------------------------------------|-----------|-----------|-------|-----------|-----------|-------|
| eGFR (mL/min/1.73m <sup>2</sup> ), mean (SD) | 9.4 (5.0) | 9.2 (5.0) | 0.001 | 9.5 (4.9) | 9.3 (4.9) | 0.002 |
| eGFR (mL/min/1.73m <sup>2</sup> ), %         |           |           |       |           |           |       |
| <5                                           | 14.9      | 16.6      | 0.003 | 14.7      | 16.4      | 0.001 |
| 5-10                                         | 48.8      | 49.0      |       | 47.9      | 47.9      |       |
| 10-15                                        | 25.8      | 25.0      |       | 26.9      | 25.5      |       |
| >15                                          | 10.5      | 9.4       |       | 10.5      | 10.3      |       |

**Footnotes:** <sup>a</sup> Samples limited to incident kidney failure patients who initiated dialysis or had a preemptive transplant between March 1 and June 30 of each year. <sup>b</sup>Census block groups were separated into quintiles of area deprivation based on scores in the 2018 Area Deprivation Index.

**eTable 3.** Characteristics of Patients with Incident Kidney Failure by Residence in a County COVID-19 Mortality Rate Quintile, 2018-2020 <sup>a,b</sup>

| Characteristic                                            | Lowest County-Level COVID-19 Mortality Rate Quintile |                |        | Highest County-Level COVID-19 Mortality Rate Quintile |                |        |
|-----------------------------------------------------------|------------------------------------------------------|----------------|--------|-------------------------------------------------------|----------------|--------|
|                                                           | 2018-2019                                            | 2020           | p      | 2018-2019                                             | 2020           | p      |
| N                                                         | 4,940                                                | 2,217          |        | 37,970                                                | 15,992         |        |
| Age, mean (SD)                                            | 63.5<br>(14.7)                                       | 64.0<br>(14.7) | 0.21   | 63.3<br>(15.4)                                        | 62.8<br>(15.2) | <0.001 |
| Age Category, %                                           |                                                      |                |        |                                                       |                |        |
| 0-17                                                      | 0.5                                                  | 0.8            | 0.34   | 0.6                                                   | 0.6            | 0.002  |
| 18-44                                                     | 10.5                                                 | 9.9            |        | 11.3                                                  | 11.7           |        |
| 45-64                                                     | 34.9                                                 | 33.8           |        | 36.3                                                  | 37.5           |        |
| 65-74                                                     | 29.7                                                 | 31.2           |        | 26.9                                                  | 26.9           |        |
| 75 and older                                              | 24.4                                                 | 24.4           |        | 24.9                                                  | 23.3           |        |
| Male                                                      | 58.7                                                 | 58.4           | 0.84   | 58.6                                                  | 58.6           | 0.89   |
| Female, %                                                 | 41.3                                                 | 41.6           | 0.84   | 41.4                                                  | 41.4           | 0.89   |
| Race/Ethnicity, %                                         |                                                      |                |        |                                                       |                |        |
| White                                                     | 78.9                                                 | 76.4           | 0.020  | 47.5                                                  | 43.0           | <0.001 |
| Black                                                     | 8.1                                                  | 8.7            | 0.36   | 31.0                                                  | 35.3           | <0.001 |
| Hispanic/Latino                                           | 7.6                                                  | 8.7            | 0.11   | 15.0                                                  | 14.9           | 0.87   |
| Current Employment Status, %                              |                                                      |                |        |                                                       |                |        |
| Retired (Age or Disability)                               | 66.7                                                 | 68.7           | 0.30   | 58.0                                                  | 58.2           | 0.31   |
| Unemployed                                                | 17.8                                                 | 17.5           |        | 24.1                                                  | 23.5           |        |
| Employed (Full/Part)                                      | 11.1                                                 | 10.1           |        | 12.8                                                  | 12.9           |        |
| Insurance Type, %                                         |                                                      |                |        |                                                       |                |        |
| Dual                                                      | 12.2                                                 | 13.2           | 0.25   | 14.0                                                  | 13.3           | <0.001 |
| Medicare                                                  | 56.3                                                 | 54.7           |        | 46.3                                                  | 45.4           |        |
| Medicaid                                                  | 11.6                                                 | 11.8           |        | 17.3                                                  | 18.0           |        |
| Employer                                                  | 9.8                                                  | 8.8            |        | 12.6                                                  | 13.7           |        |
| Other                                                     | 5.5                                                  | 5.9            |        | 5.8                                                   | 5.9            |        |
| Uninsured                                                 | 0.8                                                  | 0.7            |        | 0.4                                                   | 0.4            |        |
| Primary Cause, %                                          |                                                      |                |        |                                                       |                |        |
| Diabetes                                                  | 51.1                                                 | 48.8           | 0.07   | 45.6                                                  | 45.2           | 0.47   |
| Hypertension                                              | 20.1                                                 | 20.8           | 0.50   | 28.9                                                  | 28.1           | 0.064  |
| Other                                                     | 28.8                                                 | 30.4           | 0.17   | 25.5                                                  | 26.7           | 0.006  |
| Treatment Modality & Setting, %                           |                                                      |                |        |                                                       |                |        |
| In-Center Hemodialysis                                    | 84.4                                                 | 81.9           | 0.009  | 85.6                                                  | 84.6           | 0.004  |
| Home Dialysis                                             | 13.3                                                 | 17.1           | <0.001 | 10.6                                                  | 12.8           | <0.001 |
| Preemptive Kidney Transplant                              | 2.0                                                  | 0.9            | <0.001 | 2.1                                                   | 1.5            | <0.001 |
| Skilled Nursing Facility/Long-Term Care Facility Dialysis | 0.2                                                  | 0.2            | <0.001 | 1.7                                                   | 1.1            | <0.001 |
| Received Pre-Dialysis Nephrology Care, %                  |                                                      |                |        |                                                       |                |        |
| Yes                                                       | 73.9                                                 | 73.8           | 0.44   | 66.3                                                  | 66.8           | <0.001 |
| No                                                        | 16.6                                                 | 15.8           |        | 17.5%                                                 | 15.8%          |        |
| Unknown                                                   | 9.5                                                  | 10.3           |        | 16.2%                                                 | 17.3%          |        |
| Vascular Access Type (Hemodialysis Patients), %           |                                                      |                |        |                                                       |                |        |
| Catheter                                                  | 82.5                                                 | 84.3           | 0.29   | 81.3                                                  | 84.1           | <0.001 |
| Arteriovenous Fistula                                     | 15.4                                                 | 14.0           |        | 15.3                                                  | 13.1           |        |
| Other                                                     | 2.1                                                  | 1.7            |        | 3.5                                                   | 2.8            |        |
| eGFR (mL/min/1.73m <sup>2</sup> ), mean (SD)              | 10.3<br>(4.9)                                        | 10.3<br>(5.0)  | 0.81   | 9.5<br>(5.0)                                          | 9.2<br>(4.9)   | <0.001 |

|                                      |      |      |      |      |      |        |
|--------------------------------------|------|------|------|------|------|--------|
| eGFR (mL/min/1.73m <sup>2</sup> ), % |      |      |      |      |      |        |
| <5                                   | 12.8 | 13.2 | 0.02 | 14.8 | 17.2 | <0.001 |
| 5-10                                 | 47.3 | 47.8 |      | 48.2 | 47.8 |        |
| 10-15                                | 28.9 | 28.5 |      | 26.5 | 25.2 |        |
| >15                                  | 11.1 | 10.5 |      | 10.5 | 9.8  |        |

**Footnotes:** <sup>a</sup> Samples limited to incident kidney failure patients who initiated dialysis or had a preemptive transplant between March 1 and June 30 of each year. <sup>b</sup> Quintiles of county-level COVID-19-related deaths per capita calculated using county-level daily number of new COVID-19-related deaths (March-June 2020) and U.S. Census Bureau county population estimates for 2020.

**eFigure 1.** Monthly Trends in Number of Incident Kidney Failure Patients by Race/Ethnicity, Neighborhood Socioeconomic Disadvantage, and County-Level COVID-19 Mortality Rate, January 2018-June 2020

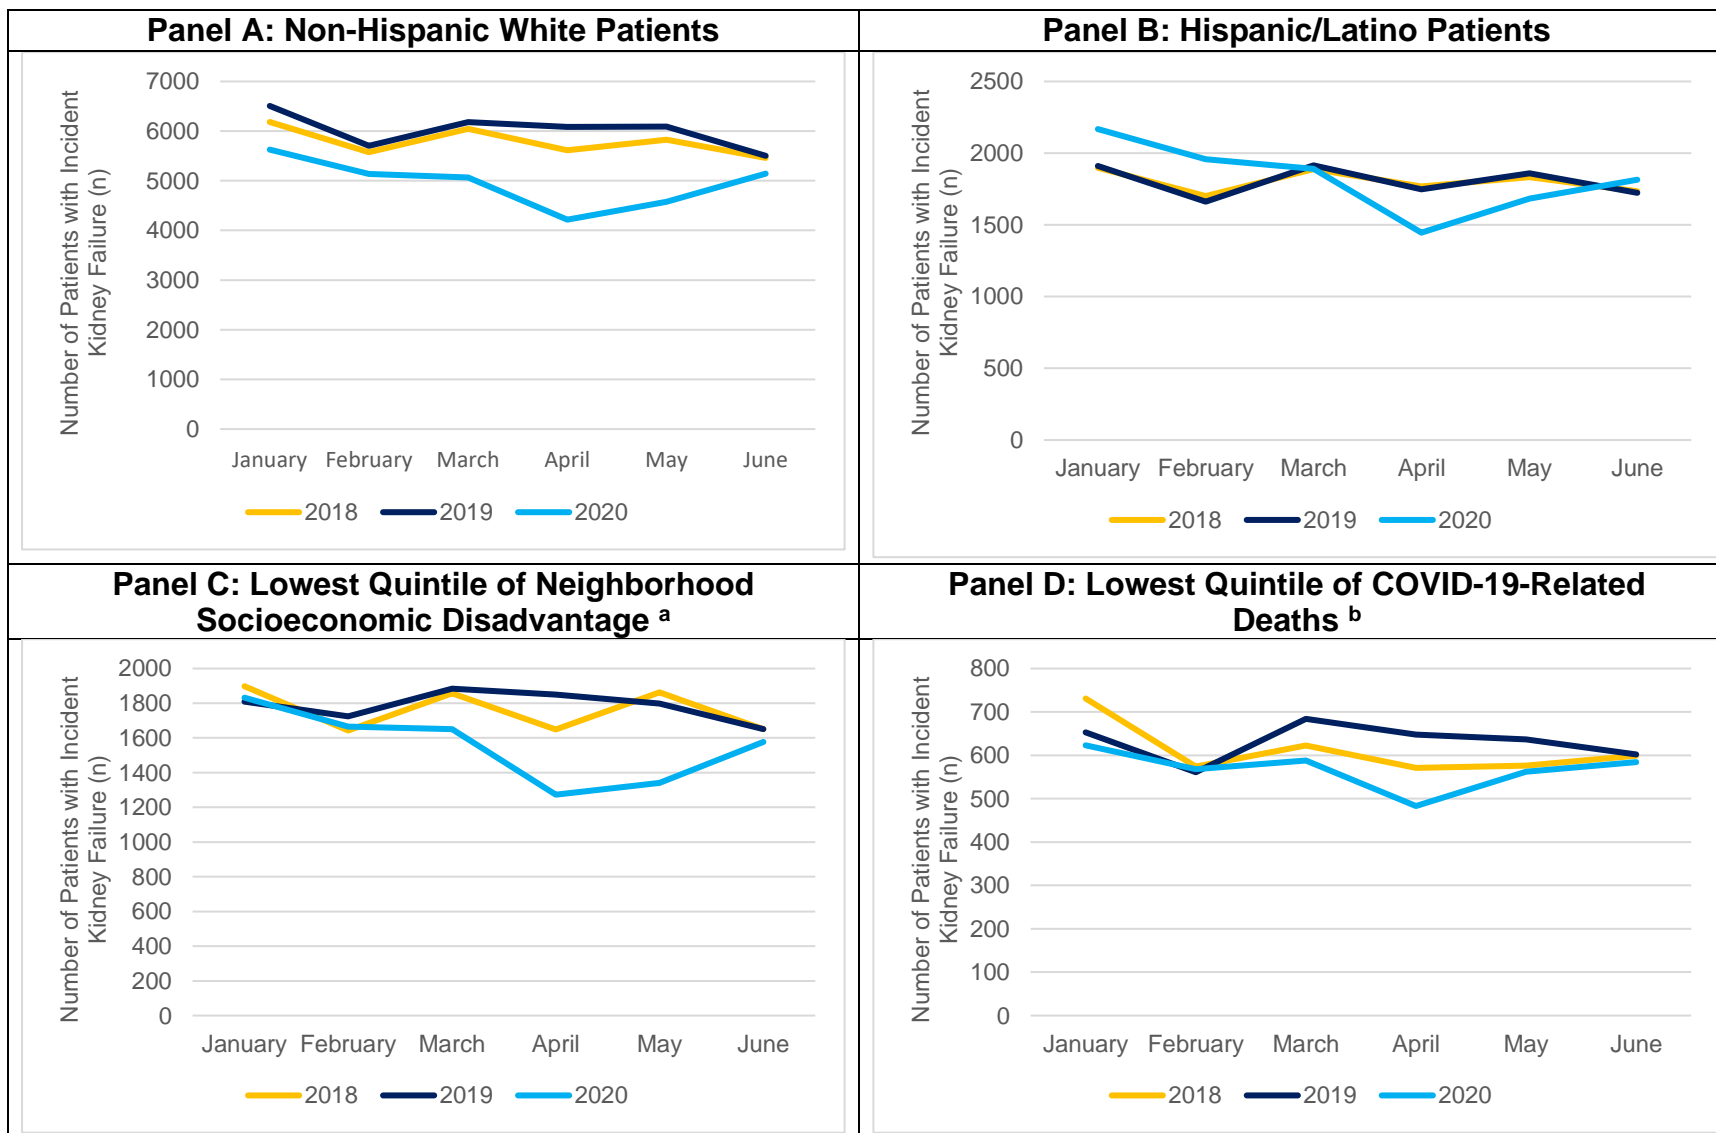

**Footnotes.** <sup>a</sup> Census block groups were separated into quintiles of area deprivation based on scores in the 2018 Area Deprivation Index. “Lowest Quintile of Neighborhood Disadvantage” reflects the least disadvantaged neighborhoods. <sup>b</sup> Quintiles of county-level COVID-19-related deaths per capita between March 1-June 30, 2020 were calculated using CDC-reported daily number of new COVID-19-related deaths, and denominator used U.S. Census Bureau county population estimates. Because of the number of deaths that were indicated as “Unallocated/Probable” in New York City, we combined the number of COVID-19-related deaths and populations in the five counties that comprise New York City (Bronx, Kings, New York, Queens, and Richmond).



**eFigure 2.** Trends in Mean Estimated Glomerular Filtration Rate (eGFR) at Treatment Initiation by Race/Ethnicity, Neighborhood Disadvantage, and COVID-19 Mortality Rate, January 2018-June 2020

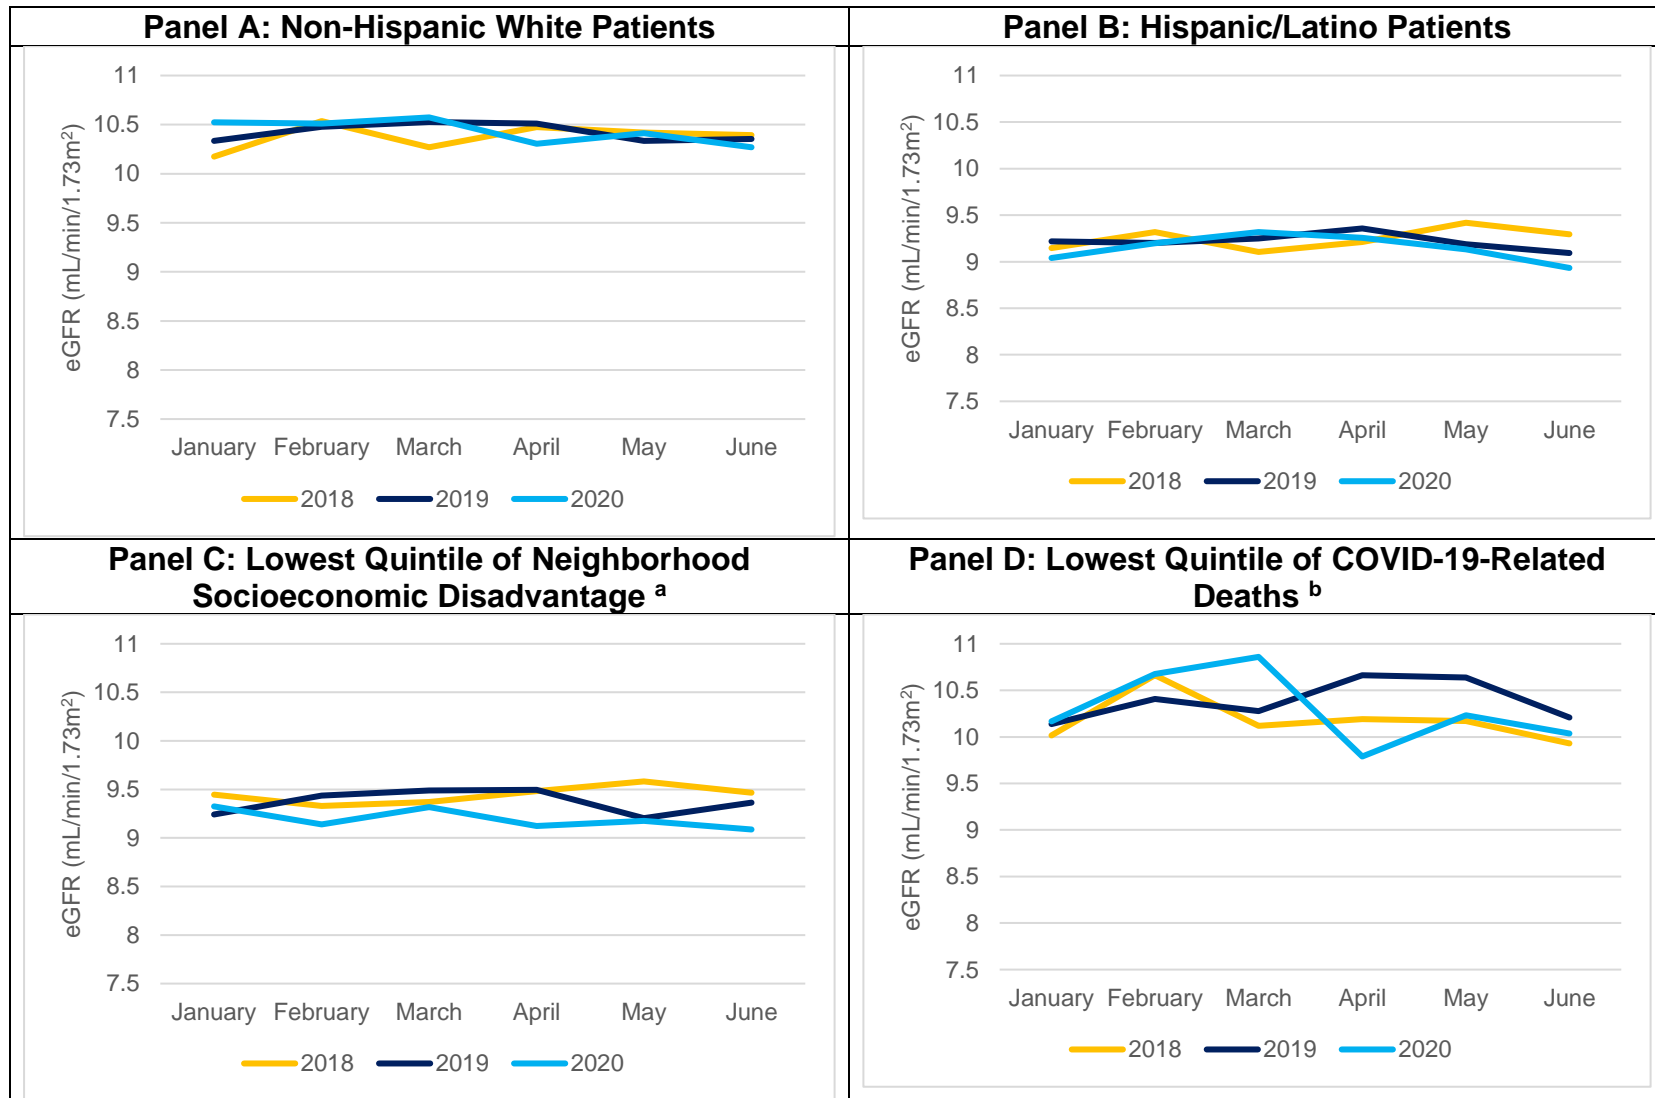

**Footnotes.** <sup>a</sup> Census block groups were separated into quintiles of area deprivation based on scores in the 2018 Area Deprivation Index. “Lowest Quintile of Neighborhood Disadvantage” reflects the least disadvantaged neighborhoods. <sup>b</sup> Quintiles of county-level COVID-19-related deaths per capita between March 1-June 30, 2020 were calculated using CDC-reported daily number of new COVID-19-related deaths, and denominator used U.S. Census Bureau county population estimates. Because of the number of deaths that were indicated as “Unallocated/Probable” in New York City, we combined the number of COVID-19-related deaths and populations in the five counties that comprise New York City (Bronx, Kings, New York, Queens, and Richmond).

**eFigure 3.** Comparison of Observed and Estimated Number of Patients with Incident Kidney Failure by Week, January 2018-June 2020 <sup>a</sup>

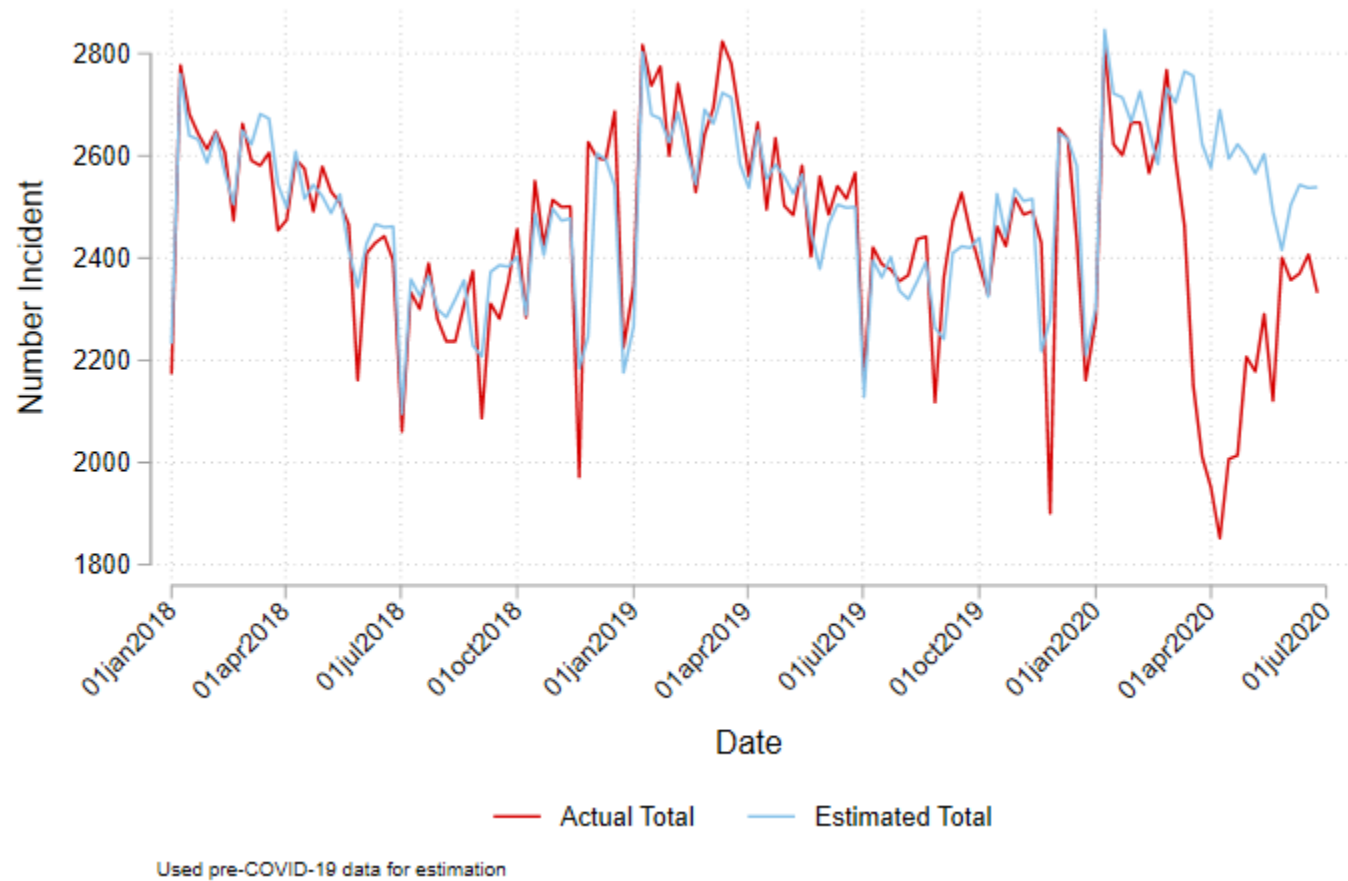

**Footnotes.** <sup>a</sup> The estimated number of patients with incident kidney failure patients was estimated by fitting a Poisson regression model using weekly counts of the number of patients with incident kidney failure in the pre-pandemic period (January 2018 through February 2020), adjusting for linear time trend and seasonality using weekly fixed effects.

**eFigure 4.** Changes in Kidney Failure Incidence by Week and Race/Ethnicity, January 2018-June 2020 <sup>a</sup>

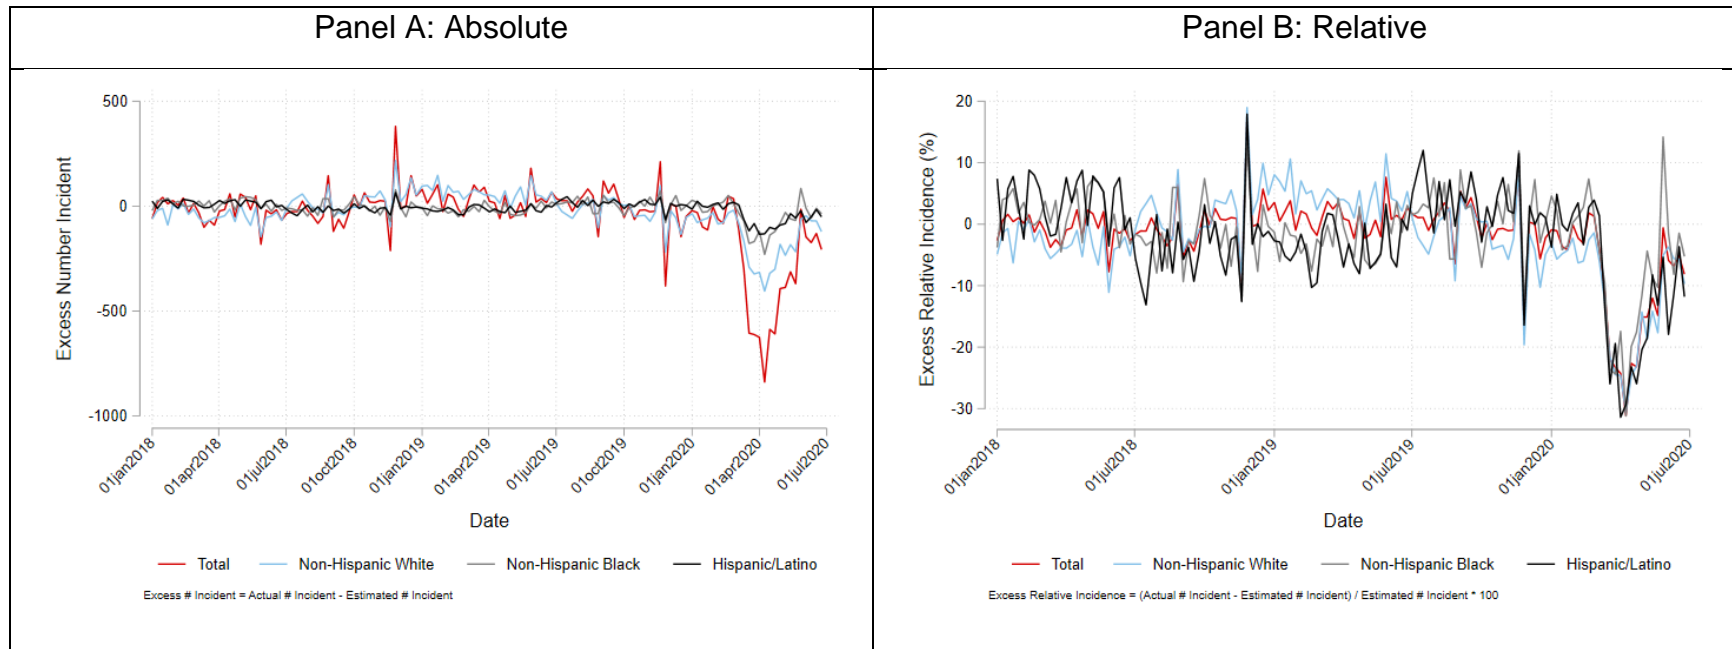

**Footnotes.** <sup>a</sup> The estimated number of patients with incident kidney failure was estimated by fitting a Poisson regression model using weekly counts of the number of patients with incident kidney failure in the pre-pandemic period (January 2018 through February 2020), adjusting for linear time trend and seasonality using weekly fixed effects. Counts were estimated overall and separately for each racial/ethnic group. Change in kidney failure incidence was defined as the difference between the estimated and observed numbers of patients with incident kidney failure, and relative differences between estimated and observed counts.

## References

1. US Department of Health and Human Services. End Stage Renal Disease Medical Evidence Report Medicare Entitlement and/or Patient Registration: Form CMS-2728-U3. *Centers for Medicare and Medicaid Services* 2006.
2. University of Wisconsin School of Medicine Public Health. In:2018 Area Deprivation Index v3.0.
3. Kind AJH, Buckingham WR. Making Neighborhood-Disadvantage Metrics Accessible - The Neighborhood Atlas. *N Engl J Med*. 2018;378(26):2456-2458.
4. Facts. U. Coronavirus locations: COVID-19 map by county and state. 2020; <https://usafacts.org/visualizations/coronavirus-covid-19-spread-map/>. Accessed March 16, 2021.
5. US Census Bureau. Annual Resident Population Estimates, Estimated Components of Resident Population Change, and Rates of the Components of Resident Population Change for States and Counties. 2020; <https://www.census.gov/data/tables/time-series/demo/popest/2010s-counties-total.html>.
